# Supplementary material
Source: Springer Nature journal article supplement (https://www.springermedizin.de/resource/supplementary/12890_2014_595_MOESM1_ESM.pdf/9505416)

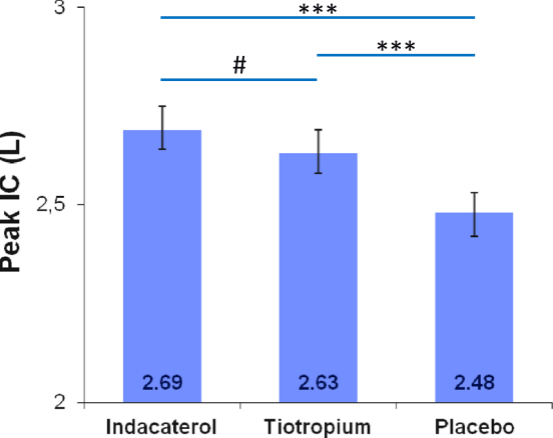

\*\*\* $p < 0.001$  vs placebo; #non-inferiority to tiotropium  
Data are least square mean  $\pm$  95% CI for FAS population  
( $n=129$ )

Supplement: MOESM1 [file 9505416]
